# Supplementary material for: Deep Breathing Couples CSF and Venous Fluid Dynamics
Source: Research Square preprint supplement (doi:10.21203/rs.3.rs-514955/v1), 2021-05-14
Supplement: Supplementary file 1 [file 961f02663762152d57e1d80b.docx]

**Supplemental Table 1. ROI sizes during normal and forced breathing**

| ROI | ROI size (mm2) | | |
| --- | --- | --- | --- |
|  | normal | forced | p-value |
| Aqd | 10.2 ± 2.5 | 10.2 ± 2.5 | 0.906 |
| C3 CSF | 116 ± 23 | 116 ± 24 | 0.576 |
| C3 EV | 12.4 ± 5.8 | 12.2 ± 5.4 | 0.259 |
| C3 IJV | 61.1 ± 20.3 | 55.8 ± 16.8 | 0.0023* |
| L3 CSF | 133 ± 35 | 129 ± 34 | 0.277 |
| L3 EV | 51.9 ± 12.8 | 51.4 ± 11.7 | 0.486 |
| L3 IVC | 245 ± 74 | 248 ± 67 | 0.588 |
